# Supplementary material for: Developmental oligodendrocytes regulate brain function through the mediation of synchronized spontaneous activity
Source: eLife. 2026 Jun 18;14:RP102200. doi: 10.7554/eLife.102200 (PMC13278736; doi:10.7554/eLife.102200)
Supplement: Supplementary file 1. [file elife-102200-supp1.xlsx]

## Sheet: Figure1I
Control_P10					DTA_P10					Control_P14					DTA_P14					Control_P21					DTA_P21					Control_P60-94					DTA_P60-94
mouse1	mouse2	mouse3	mouse4		mouse1	mouse2	mouse3	mouse4		mouse1	mouse2	mouse3	mouse4		mouse1	mouse2	mouse3	mouse4		mouse1	mouse2	mouse3	mouse4		mouse1	mouse2	mouse3	mouse4		mouse1	mouse2	mouse3	mouse4		mouse1	mouse2	mouse3	mouse4
49.7588	101.839	135.219	158.353		0	69.9885	4.70833	49.9254		157.606	110.814	177.674	117.31		0	3.55516	0	21.2949		339.445	295.676	426.191			181.807	318.787	293.02	210.225		488.953	528.037	549.759	565.78		472.088	627.65	489.018	375.546
72.8806	12.1549	129.645	79.2947		31.8322	0	0	45.8324		152.13	11.4934	35.7875	94.6753		0	0	34.7522	0		329.886	147.221	304.233	277.234		238.5	134.289	147.713	242.876		399.688	374.313	557.581	390.338		438.55	831.901	465.984	609.341
96.6184	73.2811	0	5.59152		5.2605	0	23.6734	0		173.797	135.65	96.3466	47.3936		0	15.4658	9.64388	74.7267		222.804	293.411	190.638	267.086		269.233	221.858	306.138	368.98		512.202	561.901	637.97	535.443		800.797	466.343	694.272	339.066
90.1257	98.24	65.4587	89.2528		0	6.13347	0	0		171.318	194.869	198.608	214.863		40.3805	41.9509	21.8494	91.6341		405.375	196.52	214.331	255.332		289.366	271.764	178.302	236.116				510.058	308.335		877.388	595.357
69.4645		0	51.3091		0	69.2054	37.2053	70.6207		49.646		10.2947	65.6757		0	100.423	0	0		229.953		178.469	305.055		208.027	185.902	191.196	293.183
		30.5276						0				199.582						0				332.526	210.192					46.6375
		83.7756										140.734										252.126

## Sheet: Figure 1K
Control_P10					DTA_P10					Control_P14					DTA_P14					Control_P21					DTA_P21					Control_P60-94					DTA_P60-94
mouse1	mouse2	mouse3	mouse4		mouse1	mouse2	mouse3	mouse4		mouse1	mouse2	mouse3	mouse4		mouse1	mouse2	mouse3	mouse4		mouse1	mouse2	mouse3	mouse4		mouse1	mouse2	mouse3	mouse4		mouse1	mouse2	mouse3	mouse4		mouse1	mouse2	mouse3	mouse4
3301.6	4121.88	5853.52	6915.84		71.5208	101.92	168.56	338.081		4153.24	7611.68	8048.72	1629.76		0	19.6	3.92	0		8960.16	9755.88	9548.12	8843.52		7778.24	9698.08	4929.4	9492.28		9717.68	9378.6	8907.2	9602.04		9330.6	8900.36	8988.56	8167.32
8583.84	8717.08	5321.4	5906.48		41.16	20.5608	339.08	49.9608		4675.56	7055.04	8442.72	7461.72		0	87.2008	1.96	1.96		9179.64	9180.64	8347.64	9751		7883.12	9454.08	9643.2	1511.16		9282.56	9102.24	9755.88	9517.76		8962.08	9269.8	8460.36	9101.28
1573.88	3899.44	2700.88	7105		118.599	106.839	662.48	3.92		8117.32	1662.08	4138.52	6455.28					20.5608		9639.28	9632.4	9277.68			9397.2			7034.44		7668.48	9460.92	9784.32				8387.84
5613.44	5963.28	5908.4

## Sheet: Figure S1E
Control_P10					DTA_P10					Control_P14					DTA_P14					Control_P21					DTA_P21					Control_P60-94					DTA_P60-94
mouse1	mouse2	mouse3	mouse4		mouse1	mouse2	mouse3	mouse4		mouse1	mouse2	mouse3	mouse4		mouse1	mouse2	mouse3	mouse4		mouse1	mouse2	mouse3	mouse4		mouse1	mouse2	mouse3	mouse4		mouse1	mouse2	mouse3	mouse4		mouse1	mouse2	mouse3	mouse4
20.88	23.04	20.16	30.6		4.32	11.88	13.68	10.44		21.6	32.4	42.84	16.92		0	19.6	1.96	1.96		8960.16	9755.88	9548.12	8843.52		7778.24	9698.08	9643.2	1511.16		9717.68	9378.6	8907.2	9602.04		9330.6	8900.36	8988.56	8167.32
39.96	37.08	23.04	31.32		6.48	2.16	14.76	8.64		23.04	29.16	39.96	27.72		0	87.2008	0	20.5608		9179.64	9180.64	8347.64	9751		7883.12	9454.08	9492.28	7034.44		9282.56	9102.24	9755.88	9517.76			9269.8
26.28	24.12	36	34.92		8.64	14.4	9.36	6.48		40.68	41.04	16.2	31.68			3.92				9639.28	9632.4	9277.68			9397.2	4929.4				7668.48	9460.92	9784.32				8387.84	8460.36	9101.28
25.2	24.84	25.2																																	8962.08

## Sheet: Figure 2F
CTL 0-80µm						DTA 0-80µm								CTL 120-200µm						DTA 120-200µm
mouse1	mouse2	mouse3	mouse4	mouse5		mouse1	mouse2	mouse3	mouse4	mouse5	mouse6	mouse7		mouse1	mouse2	mouse3	mouse4	mouse5		mouse1	mouse2	mouse3	mouse4	mouse5	mouse6	mouse7
0.905193	0.741835	0.79329	0.811485	0.739528		0.858098	0.599792	0.528765	0.228595	0.526574	0.756936	0.671273		0.702061	0.418138	0.578917	0.62568	0.644015		0.573134	0.397446	0.378884	-0.00244	-0.04819	0.250555	0.315349
0.858576	0.606863	0.683496	0.682442	0.61778		0.743044	0.506506	0.475224	0.055729	0.220633	0.570846	0.502939		0.333927	0.654795	0.37874	0.548757	0.644037		0.56964	0.395566	0.394958	-0.01241	-0.03847	0.224936	0.300743
0.750626	0.69544	0.726591	0.695517	0.668368		0.66689	0.510614	0.295902	0.23275	0.481147	0.616576	0.574046		0.249658	0.601684	0.485494	0.479775	0.294411		0.483577	0.381985	0.18362	-0.03407	0.040789	0.272283	0.305855
0.648968	0.606714	0.648108	0.604331	0.561488		0.584103	0.470126	0.254667	0.06955	0.228432	0.471902	0.454255

## Sheet: Figure 4D
CTL 0-80µm						DTA 0-80µm								CTL 120-200µm						DTA 120-200µm
mouse1	mouse2	mouse3	mouse4	mouse5	mouse6	mouse1	mouse2	mouse3	mouse4	mouse5	mouse6			mouse1	mouse2	mouse3	mouse4	mouse5	mouse6	mouse1	mouse2	mouse3	mouse4	mouse5	mouse6
0.641609	0.614071	0.534597	0.516584	0.52269	0.492277	0.462047	0.424301	0.33458	0.294909	0.30186	0.279403			0.466167	0.479619	0.469532	0.469514	0.462127	0.442091	0.137816	0.159631	0.107289	0.186545	0.143826	0.17469
0.584231	0.557234	0.532818	0.559615	0.565653	0.541039	0.262713	0.240235	0.258979	0.236113	0.198805	0.166278			0.460475	0.451649	0.454705	0.448395	0.463161	0.417556	0.117225	0.136764	0.162031	0.135723	0.18995	0.112016
0.933327	0.890364	0.888721	0.864217	0.854016	0.846975	0.79603	0.639482	0.592262	0.58587	0.542117	0.520075			0.623685	0.607393	0.607594	0.593217	0.592496	0.592438	0.255334	0.242996	0.310925	0.220053	0.196852	0.223832
0.734483	0.715809	0.713729	0.704843	0.690871	0.676688	0.46365	0.466333	0.433652	0.389543	0.426968	0.342971			0.569948	0.553072	0.556885	0.551061	0.554295	0.538756	0.232234	0.202472	0.241492	0.267203	0.231295	0.206513

## Sheet: Figure6C
4 weeks	CTL						DTA
	mouse1	mouse2	mouse3	mouse4			mouse1	mouse2	mouse3	mouse4
	208	304	200	328			96	102	96	36
	200	152	304	280			84	96	66	126
	408	296	408	176			96	162	72
	328	520
8 weeks	CTL						DTA
	mouse1	mouse2	mouse3	mouse4	mouse5		mouse1	mouse2	mouse3	mouse4	mouse5
	150	384	468	630	378		558	396	516	336	420
	540	264	810	600	132		234	438	258	318	714
	660	510	552	318	594		234	270	318	570	714
	444	450	300	594			312	234	390	702	438

## Sheet: Figure6G
CTL 0-80µm						DTA 0-80µm								CTL 120-200µm						DTA 120-200µm
mouse1	mouse2	mouse3	mouse4	mouse5		mouse1	mouse2	mouse3	mouse4	mouse5				mouse1	mouse2	mouse3	mouse4	mouse5
0.943926	0.752921	0.54854	0.594899	0.86707		0.691512	0.687278	0.569525	0.466764	0.876906				0.784447	0.669022	0.40837	0.457852	0.73397
0.724063	0.93324	0.73072	0.470223	0.58741		0.580854	0.903504	0.702276	0.64253	0.581441				0.482071	0.7769	0.65359	0.396832	0.45291
0.576988	0.70326	0.8775	0.69802	0.46747		0.724532	0.66932	0.588892	0.618157	0.454318				0.415137	0.46767	0.743083	0.65093	0.39099
				0.68989						0.640895								0.65128

## Sheet: Figure7H
CTL					Kir2.1
mouse1	mouse2	mouse3	mouse4		mouse1	mouse2	mouse3	mouse4
20	23.0769	0	0		25	26.6667	7.69231	16.6667
33.3333	25	6.25	15.3846		23.5294	28.5714	18.1818	30
33.3333	12.5	22.2222	18.1818		54.5455	25	12.5	33.3333
4.54545	33.3333	33.3333	28.5714		35.7143	21.4286	44.4444	16.6667
